# Supplementary material
Source: PubMed Central journal article supplement (PMC5621903)

Figure S1A

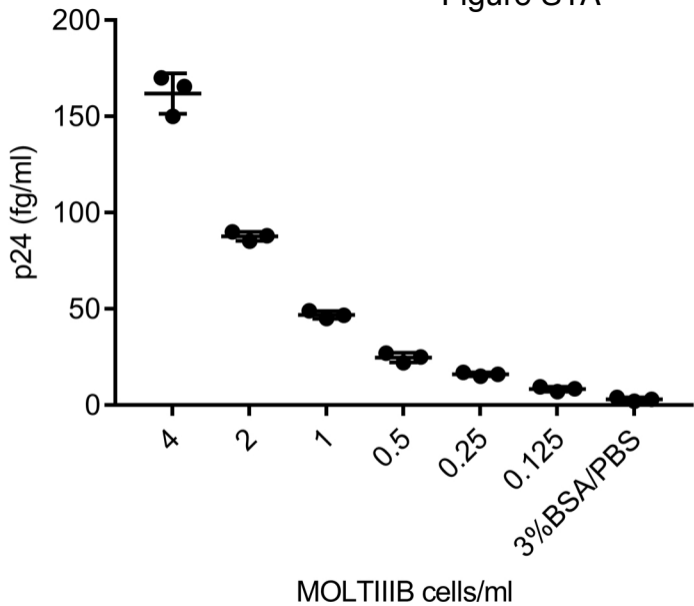

Figure S1B

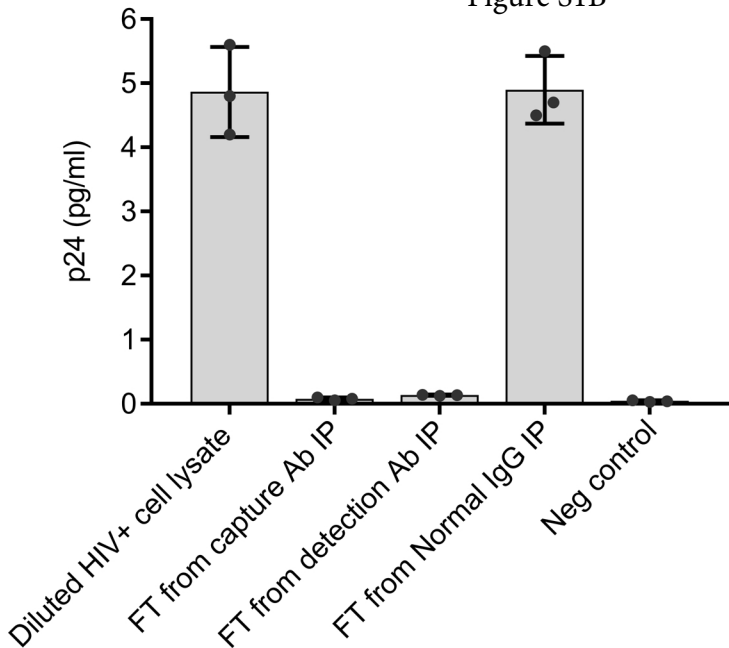

Figure S1C

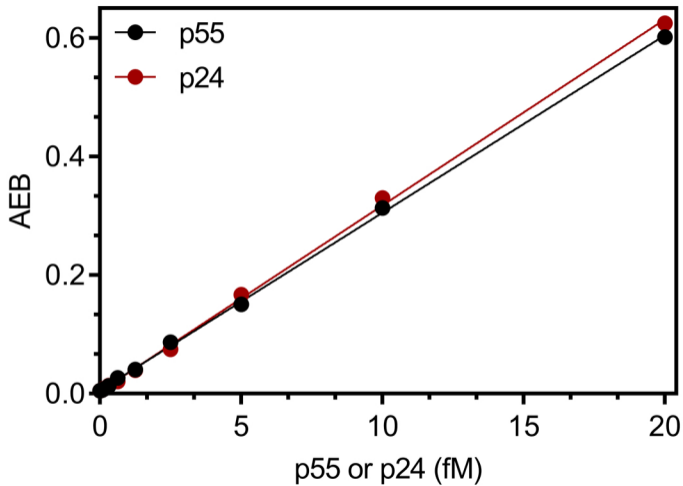

Figure S2

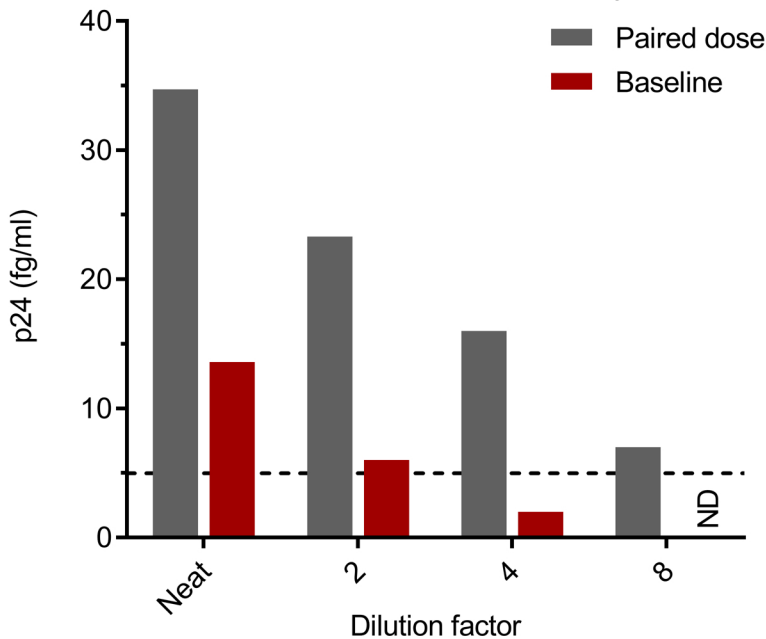

Figure S3

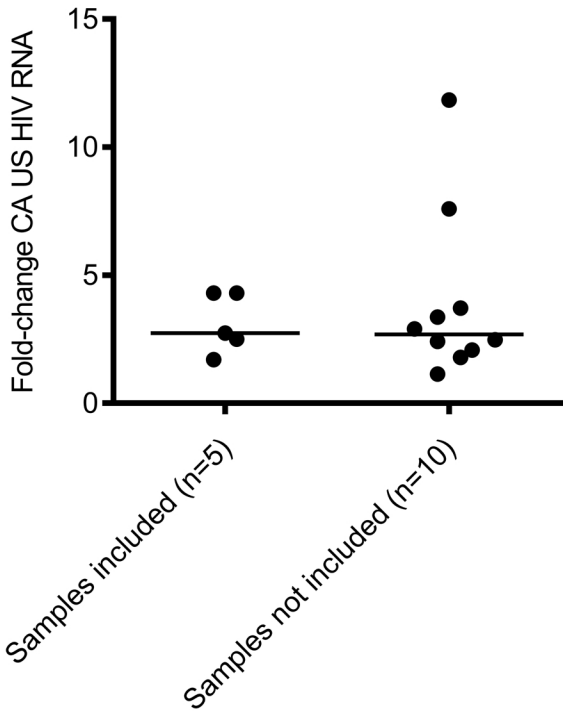

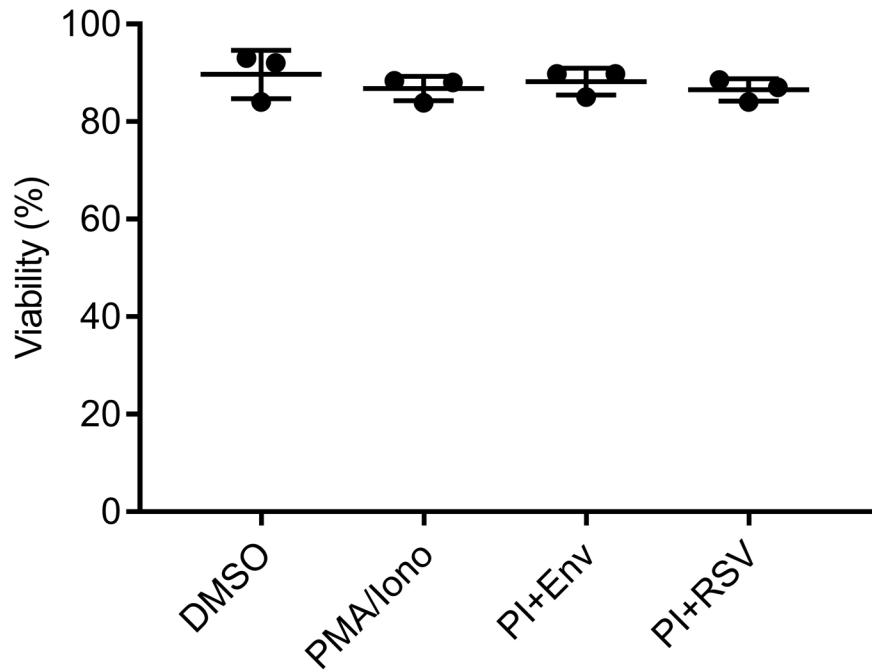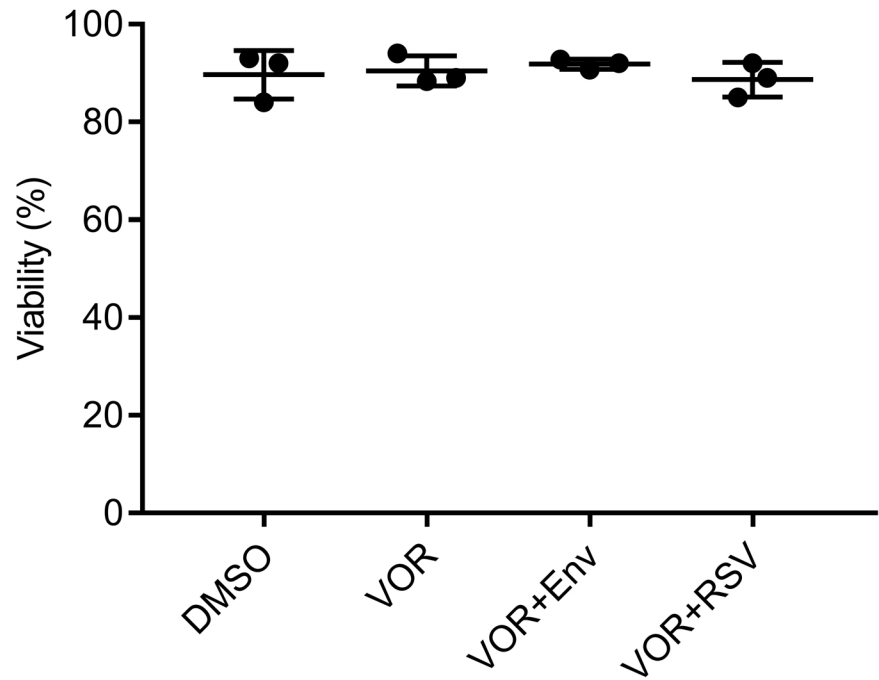

Supplement: jciinsight-2-92901-s001.pdf [file jciinsight-2-92901-s001.pdf]
